# Supplementary material for: Seeds harvested during mowing from semi-natural grasslands as an ad hoc but effective solution for grassland restoration
Source: PeerJ journal article supplement (doi:10.7717/peerj.13621), 2022-07-13
Supplement: Supplimental_Table_S2_Raw_Data.pdf [file Supplimental_Table_S2_Raw_Data.pdf]

Table S2.1 Frequencies of each species in each trial and species coverage in field experiments

| Species                                             | Seed check mower       | Pot experiment mower     |                      |                      | Field 1 experiment mower |       | Field 2 experiment mower |       |
|-----------------------------------------------------|------------------------|--------------------------|----------------------|----------------------|--------------------------|-------|--------------------------|-------|
|                                                     | Frequency (10 samples) | Sowed (July 2020)        |                      | Sowed (October 2020) | Frequency                | Cover | Frequency                | Cover |
|                                                     |                        | Frequency (October 2020) | Frequency (May 2021) | Frequency (May 2021) |                          |       |                          |       |
| <i>Agrostis capillaris</i> L.                       | -                      | 1                        | 0.9                  | 1                    | -                        | -     | -                        | -     |
| <i>Alopecurus pratensis</i> L.                      | 1                      | 0.3                      | 0.1                  | 0.2                  | -                        | -     | -                        | -     |
| <i>Anthemis tinctoria</i> L.                        | -                      | -                        | -                    | -                    | 0.5                      | 1.5   | -                        | -     |
| <i>Anthoxanthum odoratum</i> L.                     | 0.9                    | 0.4                      | -                    | -                    | -                        | -     | -                        | -     |
| <i>Anthriscus sylvestris</i> (L.) Hoffm.            | 0.1                    | -                        | -                    | -                    | -                        | -     | -                        | -     |
| <i>Arabidopsis thaliana</i> (L.) Heynh.             | -                      | -                        | -                    | -                    | 0.75                     | 3.7   | -                        | -     |
| <i>Arrhenatherum elatius</i> (L.) J.Presl & C.Presl | 0.9                    | 0.7                      | 0.9                  | 1                    | 1                        | 41.3  | 0.5                      | 20.0  |
| <i>Artemisia vulgaris</i> L.                        | -                      | 0.4                      | 0.2                  | 0.2                  | 0.5                      | 1     | -                        | -     |
| <i>Bromus hordeaceus</i> L.                         | 0.3                    | -                        | -                    | -                    | 0.5                      | 3     | 0.5                      | 2.5   |
| <i>Bromus sterilis</i> L.                           | -                      | -                        | -                    | -                    | 1                        | 3.8   | -                        | -     |
| <i>Campanula patula</i> L.                          | -                      | -                        | -                    | 0.3                  | -                        | -     | -                        | -     |
| <i>Capsella bursa-pastoris</i> (L.) Medik.          | -                      | -                        | -                    | -                    | 0.5                      | 3.5   | 0.5                      | 3.0   |
| <i>Cerastium fontanum</i> Baumg.                    | -                      | 0.1                      | 0.5                  | 0.7                  | -                        | -     | -                        | -     |
| <i>Cirsium arvense</i> (L.) Scop.                   | -                      | -                        | -                    | 0.2                  | 1                        | 2     | -                        | -     |
| <i>Dactylis glomerata</i> L.                        | 1                      | 1                        | 1                    | 1                    | 0.25                     | 2     | 0.5                      | 1.5   |
| <i>Deschampsia caespitosa</i> (L.) P. Beauv.        | -                      | 0.2                      | -                    | -                    | -                        | -     | -                        | -     |
| <i>Descurainia sophia</i> (L.) Webb ex Prantl       | -                      | -                        | -                    | -                    | 0.25                     | 1     | -                        | -     |
| <i>Elymus repens</i> (L.) Gould                     | -                      | 0.9                      | 0.8                  | 0.7                  | 0.5                      | 1     | 0.25                     | 2.0   |
| <i>Festuca pratensis</i> Huds.                      | 1                      | 0.2                      | -                    | 0.1                  | -                        | -     | -                        | -     |
| <i>Festuca rubra</i> L.                             | 1                      | 0.7                      | 0.5                  | 0.7                  | -                        | -     | -                        | -     |
| <i>Galium mollugo</i> L.                            | 0.6                    | -                        | -                    | -                    | -                        | -     | 0.25                     | 2.0   |
| <i>Geranium pusillum</i> L.                         | -                      | -                        | -                    | -                    | 1                        | 13.8  | 0.25                     | 2.0   |
| <i>Holcus lanatus</i> L.                            | 0.9                    | 0.9                      | 1                    | 1                    | 1                        | 1.3   | 0.5                      | 1.0   |
| <i>Leucanthemum vulgare</i> Lam.                    | 0.2                    | 0.5                      | 0.5                  | 0.1                  | 0.25                     | 2     | 0.25                     | 1.0   |
| <i>Lolium perenne</i> L.                            | 0.3                    | 1                        | 0.5                  | 0.3                  | -                        | -     | 1                        | 32.5  |
| <i>Papaver orientale</i> L.                         | -                      | -                        | -                    | -                    | 0.25                     | 2     | -                        | -     |
| <i>Papaver rhoeas</i> L.                            | -                      | -                        | -                    | -                    | 1                        | 2     | -                        | -     |
| <i>Phacelia tanacetifolia</i> Benth.                | -                      | -                        | -                    | -                    | 0.25                     | 1     | -                        | -     |
| <i>Phleum pratense</i> L.                           | 0.6                    | 0.1                      | -                    | -                    | 0.25                     | 2     | 0.25                     | 2.0   |
| <i>Plantago lanceolata</i> L.                       | -                      | 0.1                      | -                    | -                    | 0.25                     | 2     | 0.5                      | 1.0   |
| <i>Poa pratensis</i> L.                             | 0.9                    | 0.9                      | 1                    | 1                    | 1                        | 1.8   | 0.5                      | 4.0   |
| <i>Polygonum persicaria</i> L.                      | -                      | 0.1                      | 0.2                  | 0.2                  | -                        | -     | -                        | -     |
| <i>Ranunculus acris</i> L.                          | -                      | -                        | 0.1                  | -                    | -                        | -     | -                        | -     |
| <i>Ranunculus repens</i> L.                         | 0.1                    | -                        | -                    | 0.2                  | -                        | -     | -                        | -     |
| <i>Rhinanthus minor</i> L.                          | 0.1                    | -                        | 0.1                  | -                    | -                        | -     | 0.5                      | 2.5   |
| <i>Rumex acetosa</i> L.                             | 0.9                    | 0.4                      | 0.6                  | 0.7                  | -                        | -     | 0.25                     | 4.0   |
| <i>Rumex obtusifolius</i> L.                        | 0.1                    | 0.1                      | -                    | -                    | -                        | -     | 0.25                     | 1.0   |
| <i>Sisymbrium officinale</i> (L.) Scop.             | -                      | -                        | -                    | -                    | 0.25                     | 3     | -                        | -     |
| <i>Solidago gigantea</i> Aiton                      | -                      | -                        | -                    | -                    | 0.75                     | 3.3   | -                        | -     |
| <i>Sonchus asper</i> (L.) Hill                      | -                      | -                        | -                    | -                    | 1                        | 2.5   | -                        | -     |
| <i>Stellaria holostea</i> L.                        | -                      | 0.1                      | -                    | -                    | -                        | -     | -                        | -     |
| <i>Stellaria media</i> (L.) Cirillo                 | -                      | 0.3                      | 0.5                  | 0.4                  | -                        | -     | 0.25                     | 2.0   |
| <i>Taraxacum officinale</i> (L.) F.H.Wigg           | -                      | 0.1                      | 0.1                  | 0.1                  | 1                        | 1.8   | 1                        | 5.8   |
| <i>Trifolium dubium</i> Sibth.                      | -                      | -                        | -                    | -                    | 0.5                      | 3     | -                        | -     |
| <i>Trifolium pratense</i> L.                        | -                      | -                        | -                    | -                    | 0.25                     | 2     | 0.5                      | 2.0   |
| <i>Trifolium repens</i> L.                          | -                      | -                        | -                    | 0.1                  | -                        | -     | 1                        | 9.5   |
| <i>Tripleurospermum maritimum</i> (L.) W.D.J. Koch  | -                      | -                        | -                    | -                    | 0.25                     | 2     | -                        | -     |
| <i>Trisetum flavescens</i> (L.) P.Beauv.            | 0.8                    | 0.1                      | -                    | -                    | 1                        | 4.3   | -                        | -     |
| Unrecognised species from Poaceae                   | -                      | -                        | 0.1                  | -                    | -                        | -     | -                        | -     |
| <i>Urtica dioica</i> L.                             | -                      | 0.2                      | 0.1                  | 0.1                  | -                        | -     | -                        | -     |



Table S2.2 Number of seedlings in petridish germination test - Seeds sown 15th October, 2

| Date      | 22th October 2020 |       |            | 29th October 2020 |       |            | 5th November 2020 |       |            | 12th November 2020 |       |            | Gross Total | Total number of seed per 1g | Germination Percentage (%) |
|-----------|-------------------|-------|------------|-------------------|-------|------------|-------------------|-------|------------|--------------------|-------|------------|-------------|-----------------------------|----------------------------|
|           | Grass             | Other | Sub total1 | Grass             | Other | Sub total2 | Grass             | Other | Sub total3 | Grass              | Other | Sub total4 |             |                             |                            |
| R1        | 322               | 6     | 328        | 112               | 0     | 112        | 93                | 22    | 0          | 22                 | 555   | 1267.1     | 43.80       |                             |                            |
| R2        | 315               | 2     | 317        | 90                | 1     | 91         | 71                | 71    | 0          | 71                 | 501   | 1267.1     | 39.54       |                             |                            |
| R3        | 360               | 1     | 361        | 96                | 1     | 97         | 45                | 0     | 0          | 45                 | 526   | 1267.1     | 41.51       |                             |                            |
| R4        | 326               | 3     | 329        | 89                | 0     | 89         | 77                | 22    | 0          | 22                 | 517   | 1267.1     | 40.80       |                             |                            |
| R5        | 304               | 2     | 306        | 136               | 1     | 137        | 86                | 0     | 0          | 86                 | 564   | 1267.1     | 44.51       |                             |                            |
| R6        | 306               | 1     | 307        | 115               | 0     | 115        | 73                | 0     | 0          | 73                 | 528   | 1267.1     | 41.67       |                             |                            |
| R7        | 308               | 2     | 310        | 118               | 0     | 118        | 64                | 0     | 0          | 64                 | 519   | 1267.1     | 40.86       |                             |                            |
| R8        | 325               | 3     | 328        | 115               | 1     | 116        | 82                | 0     | 0          | 82                 | 556   | 1267.1     | 43.88       |                             |                            |
| R9        | 329               | 2     | 331        | 103               | 0     | 103        | 85                | 0     | 0          | 85                 | 521   | 1267.1     | 41.12       |                             |                            |
| R10       | 332               | 2     | 334        | 95                | 0     | 95         | 72                | 0     | 0          | 72                 | 518   | 1267.1     | 40.86       |                             |                            |
| Total G/O | 3227              | 24    | 3251       | 1069              | 4     | 1073       | 728               | 0     | 0          | 728                | 5306  | 1267.1     | 418.75      |                             |                            |
| Total     |                   |       |            |                   |       |            |                   |       |            |                    |       |            | 5306        |                             |                            |
| Average   |                   |       |            |                   |       |            |                   |       |            |                    |       |            | 530.6       | 1267.1                      | 41.88                      |

Table S2.3 Number of seedlings in petridish germination test - Seeds sown 15th March, 20

| Date      | 22th March 2021 |       |            | 29th March 2021 |       |            | 6th April 2021 |       |            | 12th April 2021 |       |            | Gross Total | Total number of seed per 1g | Germination Percentage (%) |
|-----------|-----------------|-------|------------|-----------------|-------|------------|----------------|-------|------------|-----------------|-------|------------|-------------|-----------------------------|----------------------------|
|           | Grass           | Other | Sub total1 | Grass           | Other | Sub total2 | Grass          | Other | Sub total3 | Grass           | Other | Sub total4 |             |                             |                            |
| R1        | 328             | 0     | 328        | 89              | 0     | 89         | 87             | 14    | 0          | 14              | 518   | 1267.1     | 40.88       |                             |                            |
| R2        | 358             | 1     | 359        | 72              | 1     | 73         | 70             | 10    | 0          | 10              | 512   | 1267.1     | 40.41       |                             |                            |
| R3        | 321             | 2     | 323        | 83              | 0     | 83         | 88             | 88    | 11         | 11              | 505   | 1267.1     | 39.85       |                             |                            |
| R4        | 403             | 1     | 404        | 65              | 0     | 65         | 79             | 0     | 0          | 79              | 556   | 1267.1     | 43.88       |                             |                            |
| R5        | 354             | 0     | 354        | 70              | 0     | 70         | 57             | 0     | 0          | 57              | 491   | 1267.1     | 38.75       |                             |                            |
| R6        | 404             | 0     | 404        | 107             | 0     | 107        | 63             | 0     | 0          | 63              | 595   | 1267.1     | 46.96       |                             |                            |
| R7        | 379             | 2     | 381        | 111             | 0     | 111        | 76             | 11    | 1          | 12              | 580   | 1267.1     | 45.77       |                             |                            |
| R8        | 349             | 0     | 349        | 127             | 1     | 128        | 103            | 0     | 0          | 103             | 590   | 1267.1     | 46.96       |                             |                            |
| R9        | 344             | 1     | 345        | 121             | 1     | 122        | 87             | 0     | 0          | 87              | 561   | 1267.1     | 44.27       |                             |                            |
| R10       | 306             | 1     | 307        | 165             | 1     | 166        | 95             | 1     | 0          | 12              | 581   | 1267.1     | 45.85       |                             |                            |
| Total G/O | 3546            | 8     | 3554       | 1010            | 4     | 1014       | 805            | 1     | 1          | 806             | 5489  | 1267.1     | 433.19      |                             |                            |
| Total     |                 |       |            |                 |       |            |                |       |            |                 |       |            | 5489        |                             |                            |
| Average   |                 |       |            |                 |       |            |                |       |            |                 |       |            | 548.9       |                             | 43.32                      |

Table S2.4 Number of seedlings in petridish germination test - Seeds sown in 26th July, 20

| Date      | 3rd August 2020 |       |            | 11th August 2020 |       |            | 18th August 2020 |       |            | 24th August 2020 |       |            | Gross Total | Total number of seed per 1g | Germination Percentage (%) |        |
|-----------|-----------------|-------|------------|------------------|-------|------------|------------------|-------|------------|------------------|-------|------------|-------------|-----------------------------|----------------------------|--------|
|           | Grass           | Other | Sub total1 | Grass            | Other | Sub total2 | Grass            | Other | Sub total3 | Grass            | Other | Sub total4 |             |                             |                            |        |
| R1        | 76              | 0     | 76         | 252              | 0     | 252        | 76               | 0     | 0          | 76               | 35    | 0          | 438         | 1382                        | 31.77                      |        |
| R2        | 70              | 0     | 70         | 210              | 1     | 211        | 77               | 0     | 0          | 77               | 50    | 0          | 408         | 1386                        | 29.44                      |        |
| R3        | 75              | 1     | 76         | 213              | 1     | 214        | 92               | 0     | 0          | 92               | 34    | 0          | 416         | 1526                        | 27.26                      |        |
| R4        | 79              | 0     | 79         | 201              | 1     | 202        | 98               | 0     | 0          | 98               | 58    | 1          | 59          | 438                         | 1248                       | 35.10  |
| R5        | 86              | 0     | 86         | 201              | 2     | 203        | 54               | 0     | 0          | 54               | 51    | 0          | 51          | 394                         | 962                        | 40.96  |
| R6        | 98              | 1     | 99         | 248              | 2     | 250        | 85               | 0     | 0          | 85               | 57    | 0          | 57          | 491                         | 1292                       | 38.00  |
| R7        | 113             | 1     | 114        | 239              | 3     | 242        | 98               | 0     | 0          | 98               | 53    | 0          | 53          | 467                         | 1205                       | 38.78  |
| R8        | 121             | 0     | 121        | 264              | 1     | 265        | 83               | 0     | 0          | 83               | 48    | 0          | 48          | 517                         | 1290                       | 40.08  |
| R9        | 113             | 0     | 113        | 261              | 1     | 262        | 72               | 0     | 0          | 72               | 42    | 0          | 42          | 489                         | 1215                       | 40.25  |
| R10       | 104             | 1     | 105        | 229              | 1     | 230        | 72               | 0     | 0          | 72               | 46    | 0          | 46          | 453                         | 1165                       | 38.88  |
| Total G/O | 935             | 4     | 939        | 2318             | 13    | 2331       | 767              | 0     | 0          | 767              | 474   | 1          | 475         | 4512                        | 1267.1                     | 360.48 |
| Total     |                 |       |            |                  |       |            |                  |       |            |                  |       |            | 4512        |                             |                            |        |
| Average   |                 |       |            |                  |       |            |                  |       |            |                  |       |            | 451.2       | 1267.1                      | 36.05                      |        |

Table S2.5 Number of seeds, seeds weight and residual in 1-g of seed sample

| Sample No                   | R1     | R2     | R3     | R4     | R5   | R6     | R7     | R8     | R9     | R10    | R11   | R12    | R13    | R14    | R15    | R16    | R17     | R18   | R19    | R20   |
|-----------------------------|--------|--------|--------|--------|------|--------|--------|--------|--------|--------|-------|--------|--------|--------|--------|--------|---------|-------|--------|-------|
| Number of filled seeds (kg) | 1382   | 1386   | 1526   | 1248   | 962  | 1292   | 1205   | 1290   | 1215   | 1165   |       |        |        |        |        |        |         |       |        |       |
| Total seeds weight (g)      | 0.8695 | 0.9097 | 0.9378 | 0.9203 | 0.77 | 0.9254 | 0.9068 | 0.9062 | 0.8932 | 0.9355 | 0.903 | 0.9362 | 0.8732 | 0.9073 | 0.9137 | 0.9375 | 0.89346 | 0.918 | 0.8478 | 0.923 |
| Amount of debris (g)        | 0.1305 | 0.0903 | 0.0622 | 0.0797 | 0.23 | 0.0746 | 0.0932 | 0.0938 | 0.1068 | 0.0645 | 0.097 | 0.0638 | 0.1268 | 0.0927 | 0.0863 | 0.0625 | 0.10654 | 0.082 | 0.1522 | 0.077 |

| Date      | 19th November 2020 |       |            | 26th November 2020 |       |            | Gross Total | Total number of seed per 1g | Germination Percentage (%) |
|-----------|--------------------|-------|------------|--------------------|-------|------------|-------------|-----------------------------|----------------------------|
|           | Grass              | Other | Sub total5 | Grass              | Other | Sub total5 |             |                             |                            |
| R1        | 4                  | 0     | 4          | 5                  | 0     | 5          | 564         | 1267.1                      | 44.51                      |
| R2        | 11                 | 0     | 11         | 2                  | 0     | 2          | 514         | 1267.1                      | 40.57                      |
| R3        | 3                  | 0     | 3          | 1                  | 0     | 1          | 530         | 1267.1                      | 41.83                      |
| R4        | 6                  | 0     | 6          | 4                  | 0     | 4          | 525         | 1267.1                      | 41.28                      |
| R5        | 7                  | 0     | 7          | 8                  | 0     | 8          | 578         | 1267.1                      | 45.38                      |
| R6        | 2                  | 0     | 2          | 0                  | 0     | 0          | 538         | 1267.1                      | 42.46                      |
| R7        | 5                  | 0     | 5          | 1                  | 0     | 1          | 526         | 1267.1                      | 41.43                      |
| R8        | 4                  | 0     | 4          | 4                  | 0     | 4          | 564         | 1267.1                      | 44.51                      |
| R9        | 8                  | 0     | 8          | 0                  | 0     | 0          | 529         | 1267.1                      | 41.75                      |
| R10       | 10                 | 0     | 10         | 4                  | 0     | 4          | 533         | 1267.1                      | 42.98                      |
| Total G/O | 60                 | 0     | 60         | 29                 | 0     | 29         | 5395        | 1267.1                      | 425.78                     |
| Total     |                    |       |            |                    |       |            | 5395        |                             |                            |
| Average   |                    |       |            |                    |       |            | 539.5       | 1267.1                      | 42.58                      |

| Date      | 19th April 2021 |       |            | 26th April 2021 |       |            | Gross Total | Total number of seed per 1g | Germination Percentage (%) |
|-----------|-----------------|-------|------------|-----------------|-------|------------|-------------|-----------------------------|----------------------------|
|           | Grass           | Other | Sub total5 | Grass           | Other | Sub total5 |             |                             |                            |
| R1        | 5               | 0     | 5          | 3               | 0     | 3          | 528         | 1267.1                      | 41.51                      |
| R2        | 5               | 0     | 5          | 4               | 0     | 4          | 521         | 1267.1                      | 41.12                      |
| R3        | 5               | 0     | 5          | 2               | 0     | 2          | 512         | 1267.1                      | 40.41                      |
| R4        | 7               | 0     | 7          | 4               | 0     | 4          | 497         | 1267.1                      | 44.75                      |
| R5        | 4               | 0     | 4          | 2               | 0     | 2          | 467         | 1267.1                      | 39.22                      |
| R6        | 6               | 0     | 6          | 4               | 0     | 4          | 605         | 1267.1                      | 47.75                      |
| R7        | 7               | 0     | 7          | 5               | 0     | 5          | 592         | 1267.1                      | 46.72                      |
| R8        | 10              | 0     | 10         | 7               | 0     | 7          | 607         | 1267.1                      | 47.90                      |
| R9        | 2               | 0     | 2          | 2               | 0     | 2          | 565         | 1267.1                      | 44.59                      |
| R10       | 7               | 0     | 7          | 1               | 0     | 1          | 589         | 1267.1                      | 46.48                      |
| Total G/O | 58              | 0     | 58         | 34              | 0     | 34         | 5581        | 1267.1                      | 440.45                     |
| Total     |                 |       |            |                 |       |            | 5581        |                             |                            |
| Average   |                 |       |            |                 |       |            | 558.1       | 1267.1                      | 44.05                      |

| Date      | 1st September 2020 |       |            | 8th September 2020 |       |            | Gross Total | Total number of seed per 1g | Germination Percentage (%) |
|-----------|--------------------|-------|------------|--------------------|-------|------------|-------------|-----------------------------|----------------------------|
|           | Grass              | Other | Sub total5 | Grass              | Other | Sub total5 |             |                             |                            |
| R1        | 25                 | 0     | 25         | 6                  | 0     | 6          | 470         | 1382                        | 34.01                      |
| R2        | 38                 | 0     | 38         | 8                  | 0     | 8          | 454         | 1386                        | 32.76                      |
| R3        | 68                 | 0     | 68         | 18                 | 0     | 18         | 502         | 1526                        | 32.90                      |
| R4        | 66                 | 0     | 66         | 16                 | 0     | 16         | 620         | 1248                        | 41.87                      |
| R5        | 49                 | 0     | 49         | 9                  | 0     | 9          | 452         | 962                         | 46.99                      |
| R6        | 56                 | 1     | 57         | 13                 | 0     | 13         | 561         | 1292                        | 43.42                      |
| R7        | 48                 | 0     | 48         | 6                  | 0     | 6          | 521         | 1205                        | 43.24                      |
| R8        | 39                 | 0     | 39         | 7                  | 0     | 7          | 563         | 1290                        | 43.64                      |
| R9        | 30                 | 0     | 30         | 10                 | 0     | 10         | 498         | 1215                        | 41.89                      |
| R10       | 26                 | 0     | 26         | 9                  | 0     | 9          | 488         | 1165                        | 41.89                      |
| Total G/O | 445                | 1     | 446        | 102                | 0     | 102        | 5060        | 1267.1                      | 404.04                     |
| Total     |                    |       |            |                    |       |            | 5060        |                             |                            |
| Average   |                    |       |            |                    |       |            | 506         | 1267.1                      | 40.40                      |
